# Supplementary material for: Distinct metabolic states of a cell guide alternate fates of mutational buffering through altered proteostasis
Source: PubMed Central journal article supplement (PMC7286901; doi:10.1038/s41467-020-16804-6), 2020-06-10
Supplement: 41467_2020_16804_MOESM1_ESM.pdf [file 41467_2020_16804_MOESM1_ESM.pdf]

# **Distinct metabolic states of a cell guide alternate fates of mutational buffering through altered proteostasis**

Verma et al.

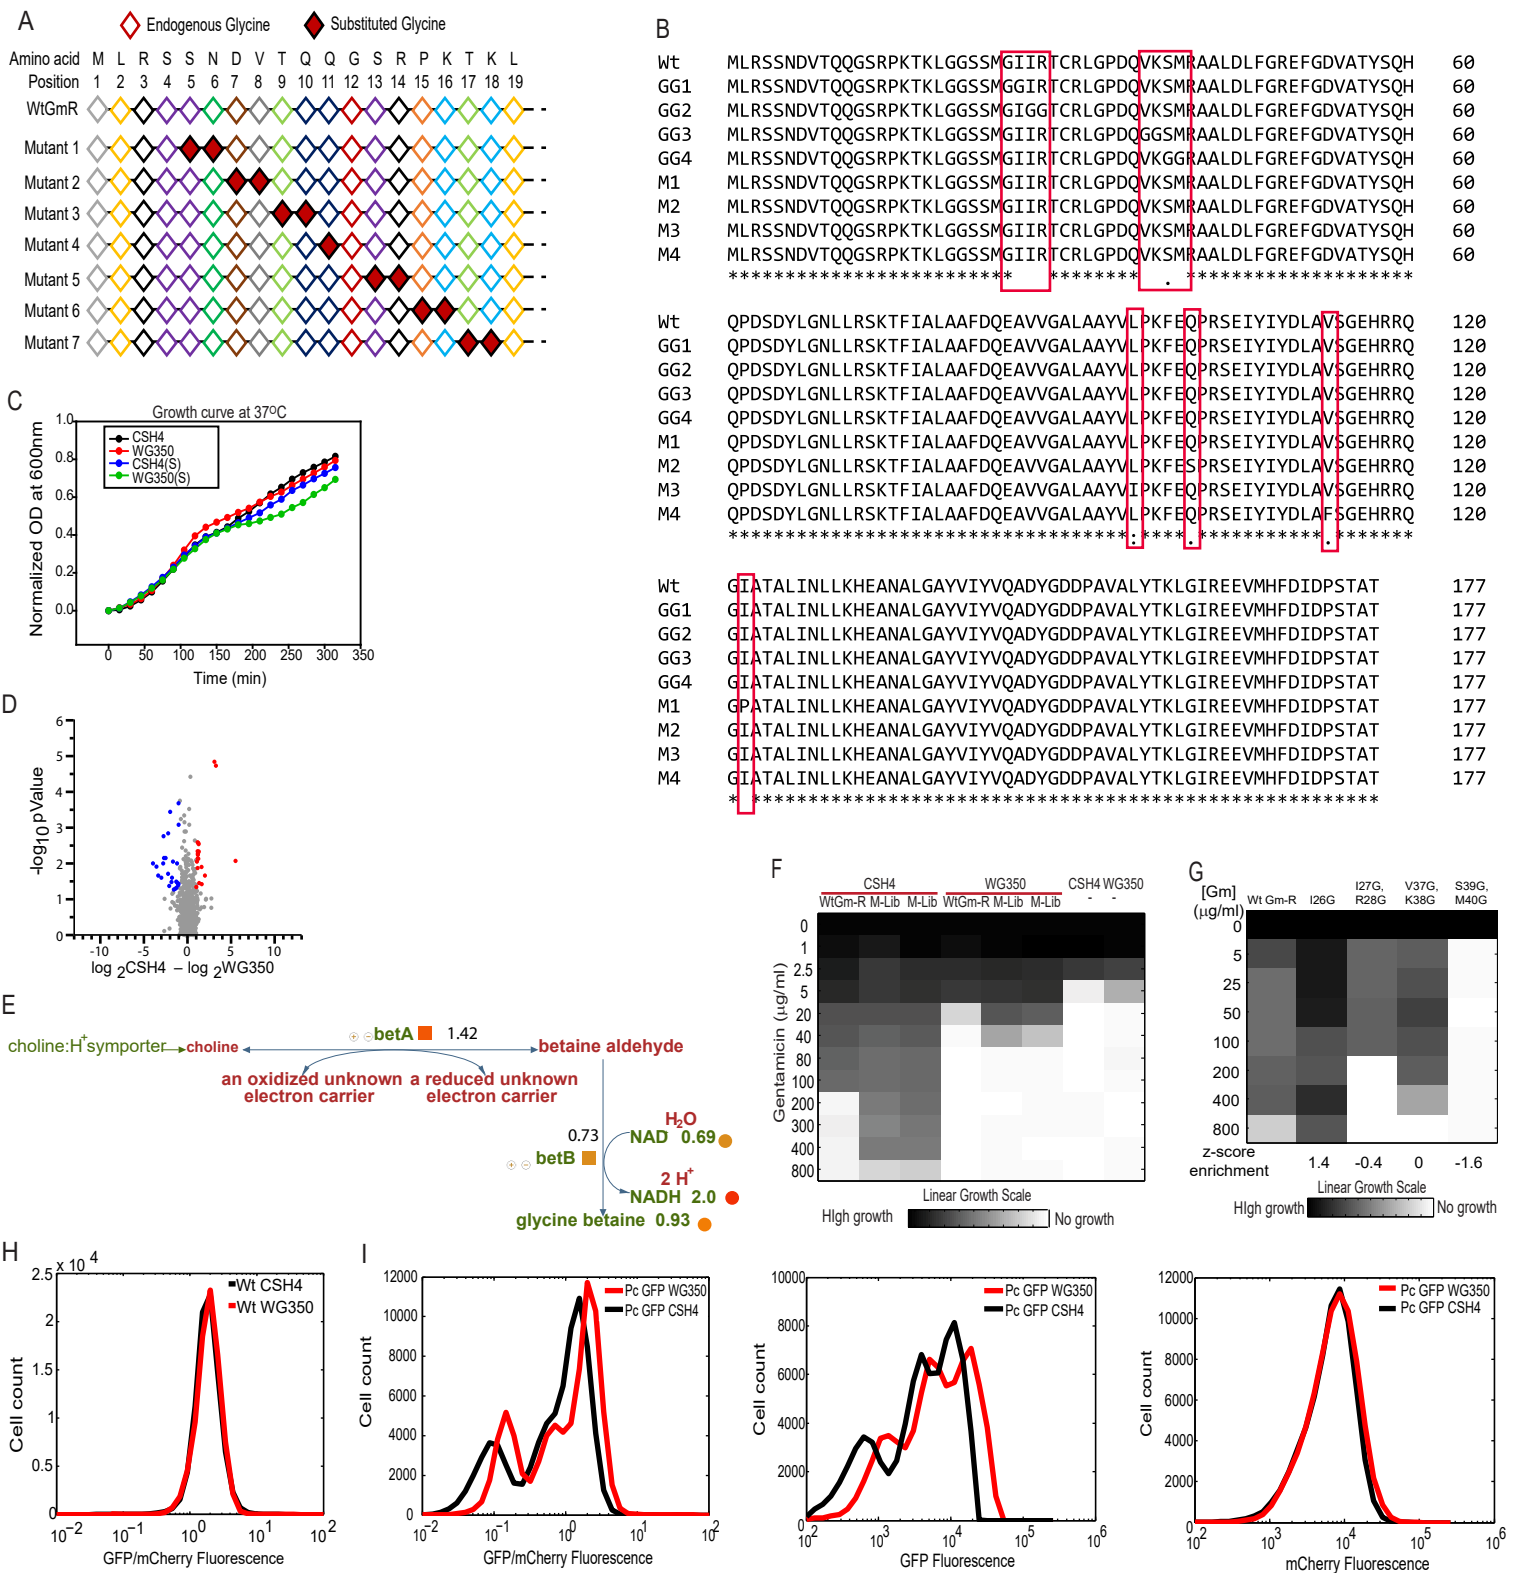

**Supplementary Figure 1: Strain specific metabolic differences lead to differential mutation buffering capacity (Related to Figure 2)**

**A.** Schematic of glycine doublet substitution library (GG) of Gm-R mutants where two consecutive amino acids have been substituted with two glycine residues (red solid filled) starting from 5th amino acid.

**B.** Amino acid sequence alignment of Wt and Gm-R mutants. Residues that are mutated are shown in red boxes.

**C.** Growth curve for *E. coli* strains CSH4 (black, blue) and WG350 (red, green) in presence and absence of 350 mM NaCl added in excess to the LB medium while growing at 37°C.

**D.** Scatter plot for mean of  $\log_2$  of fold change in metabolite concentrations between CSH4 and WG350 against  $-\log_{10}$  of p-value. The significantly altered metabolites (2-tailed paired Student's t-test p-value < 0.05, 5 biological replicates for each sample) are shown as colored dots.

**E.** Pathway for production of glycine betaine in *E. coli* showing correlation between metabolomics and transcriptomics. Metabolites upregulated are shown as circular dots and transcripts for the genes are shown as square dots. Color intensity corresponds to fold upregulation.

**F.** Growth of untransformed CSH4(-), WG350(-) and cells transformed with Wt Gm-R and glycine doublet mutant library plasmids (M-Lib) in increasing concentrations of Gentamicin (0-800 µg/ml). Increase in growth is shown as increase in color density.

**G.** Correlation between NGS based quantification of enrichment scores (z-score) and MIC based semi-quantitative activity measurement for Wt Gm-R and mutants I26G, I27G-R28G, V37G-K38G, S39G-K40G of glycine doublet mutant library.

**H.** Histogram for *in vivo* fluorescence of Wt GFP (represented as ratio of GFP/mCherry) in CSH4 (black) and WG350 (red).

**I.** Histograms for ratio of GFP/mCherry fluorescence (left) and independent fluorescence of GFP (middle) and mCherry channel (right) of mutant library Pc in CSH4 and WG350.

(Source data is provided as source data file Supplementary Figure 1)

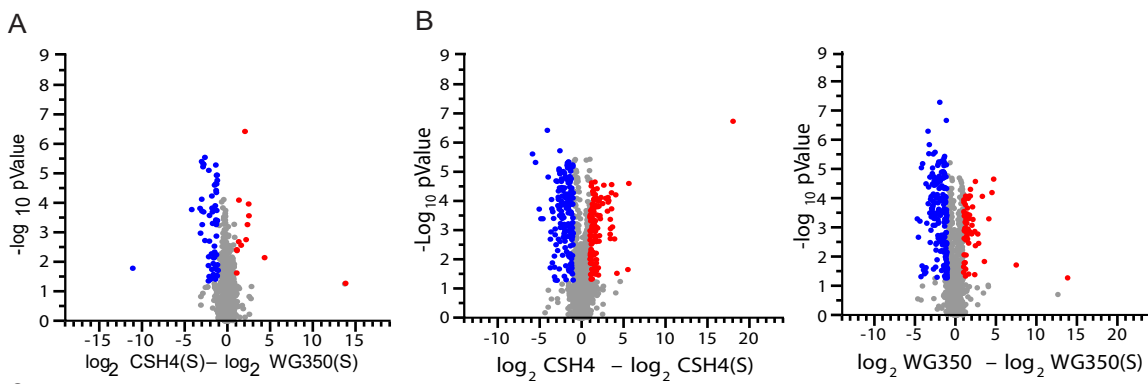

**C**

Wt MSKGEELFTGVVPIVLVDGVDVNGHKFSVSGEGEGDATYGKLTLLKFICTTGKLPVPWPTL 60  
 C1 MSKGEELFTGVVPIVLVDGVDVNGHKFSVSGEGEGDATYGKLTLLKFICTTGKLPVPWPTL 60  
 C3 MSKGEELFTGVVPIVLVDGVDVNGHKFSVSGEGEGDATYGKLTLLKFICTTGKLPVPWPTL 60  
 C6 MSKGEELFTGVVPIVLVDGVDVNGHKFSVSGEGEGDATYGKLTLLKFICTTGKLPVPWPTL 60  
 \*\*\*\*\*

Wt VTTFGYGVQCFARYPDHMKQHDFFKSAMPEGYVQERTIFFKDDGNYKTRAEVKFEGDTLV 120  
 C1 VTTFGYGVQCFARYPDHMKQHDFFKSAMPEGYVQERTIFFKDDGNYKTRAEVKFEGDTLV 120  
 C3 VTTFGYGVQCFARYPDHMKQHDFFKSAMPEGYVQERTIFFKDDGNYKTRAEVKFEGDTLV 120  
 C6 VTTFGYGVQCFARYPDHMKQHDFFKSAMPEGYVQERTIFFKDDGNYKTRAEVKFEGDTLV 120  
 \*\*\*\*\*

Wt NRIELKGIDFKEDGNILGHKLEYNYNSHNVYIMADKQKNGIKVNFKIRHNIEDGSVQLAD 180  
 C1 NRIELKGIDFKEDGNILGHKLEYNYNSHNVYIMADKQKNGIKVNFKIRHNIEDGSVQLAD 180  
 C3 NRIELKGIDFKEDGNILGHKLEYNYNSHNVYIMADKQKNGIKVNFKIRHNIEDGSVQLAD 180  
 C6 NRIELKGIDFKEDGNILGHKLEYNYNSHNVYIMADKQKNGIKVNFKIRHNIEDGSVQLAD 180  
 \*\*\*\*\*

Wt HYQQNTPIGDGPVLLPDNHYLSTQSALS KDPNEKRDHMLLEFVTAAGITHGMDELYK 238  
 C1 HYQQNTPIGDGPVLLPDNHYLSTQSALS KDPNEKRDHMLLEFVTAAGITHGMDELYK 238  
 C3 HYQQNTPIGDGPVLLPDNHYLSTQSALS KDPNETRDHMLLEFVTAAGITHGMDELYK 238  
 C6 HYQQNTPNGDGPVLLPDNHYLSTQSALS KDPNEKRDHMLLEFVTAAGITHGMDELYK 238  
 \*\*\*\*\*

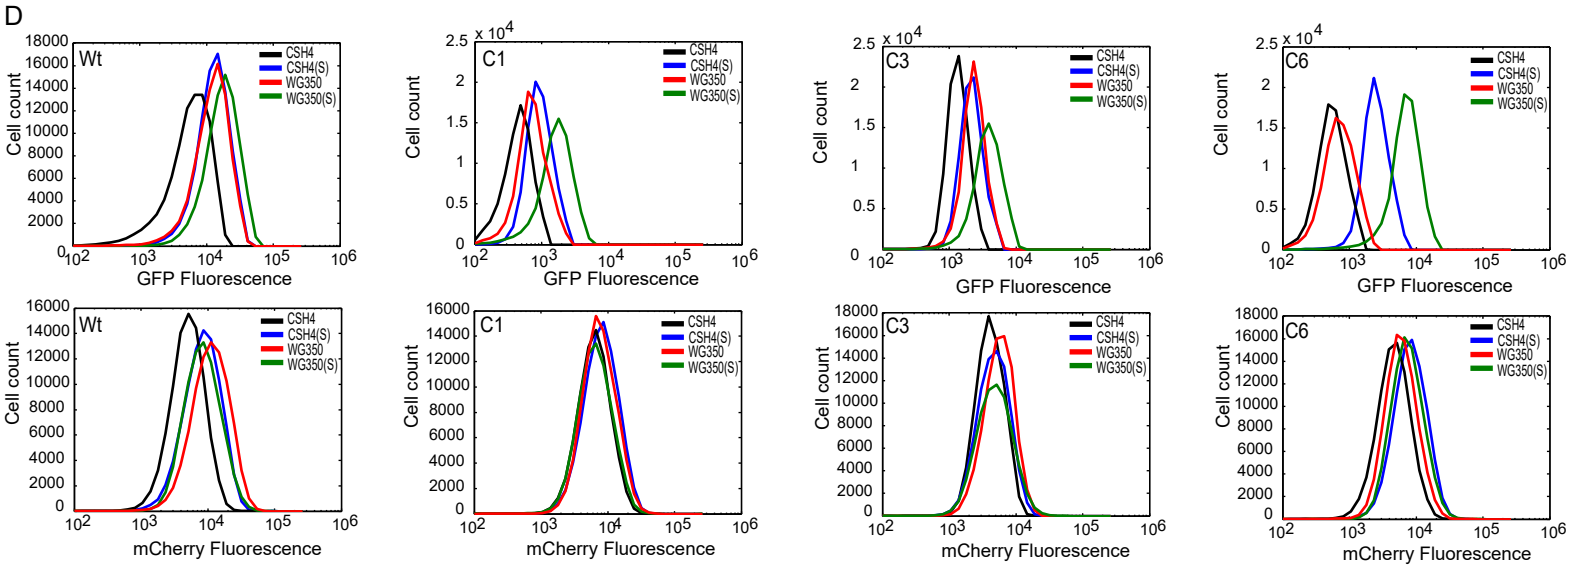

**Supplementary Figure 2: Osmotic stress induced modification in cellular metabolism changes the subset of mutations buffered (Related to Figure 3)**

**A.** Scatter plot for log<sub>2</sub> of fold change in metabolic features between WG350 and CSH4 during osmotic shock against p-value. The significantly different metabolites obtained using 2-sided student's t test (p-value < 0.05, 5 biological replicates for each sample) are represented in colored dots.

**B.** Scatter plot for log<sub>2</sub> of fold change in metabolic features within strains CSH4 (left) and WG350 (right) on osmotic shock(s) against p-value. The significantly different metabolites (p-value < 0.05, 5 biological replicates for each sample) are represented in colored dots.

**C.** Amino acid sequence alignment of Wt GFP (YeGFP) with the isolated mutants C1, C3 and C6. Mutations are shown in red boxes.

**D.** Histograms for GFP (top panel) and mCherry fluorescence (bottom panel) of the Isolated clones (Wt, C1, C3 and C6 GFP) in WG350 and CSH4 in the presence and absence of 350 mM NaCl.

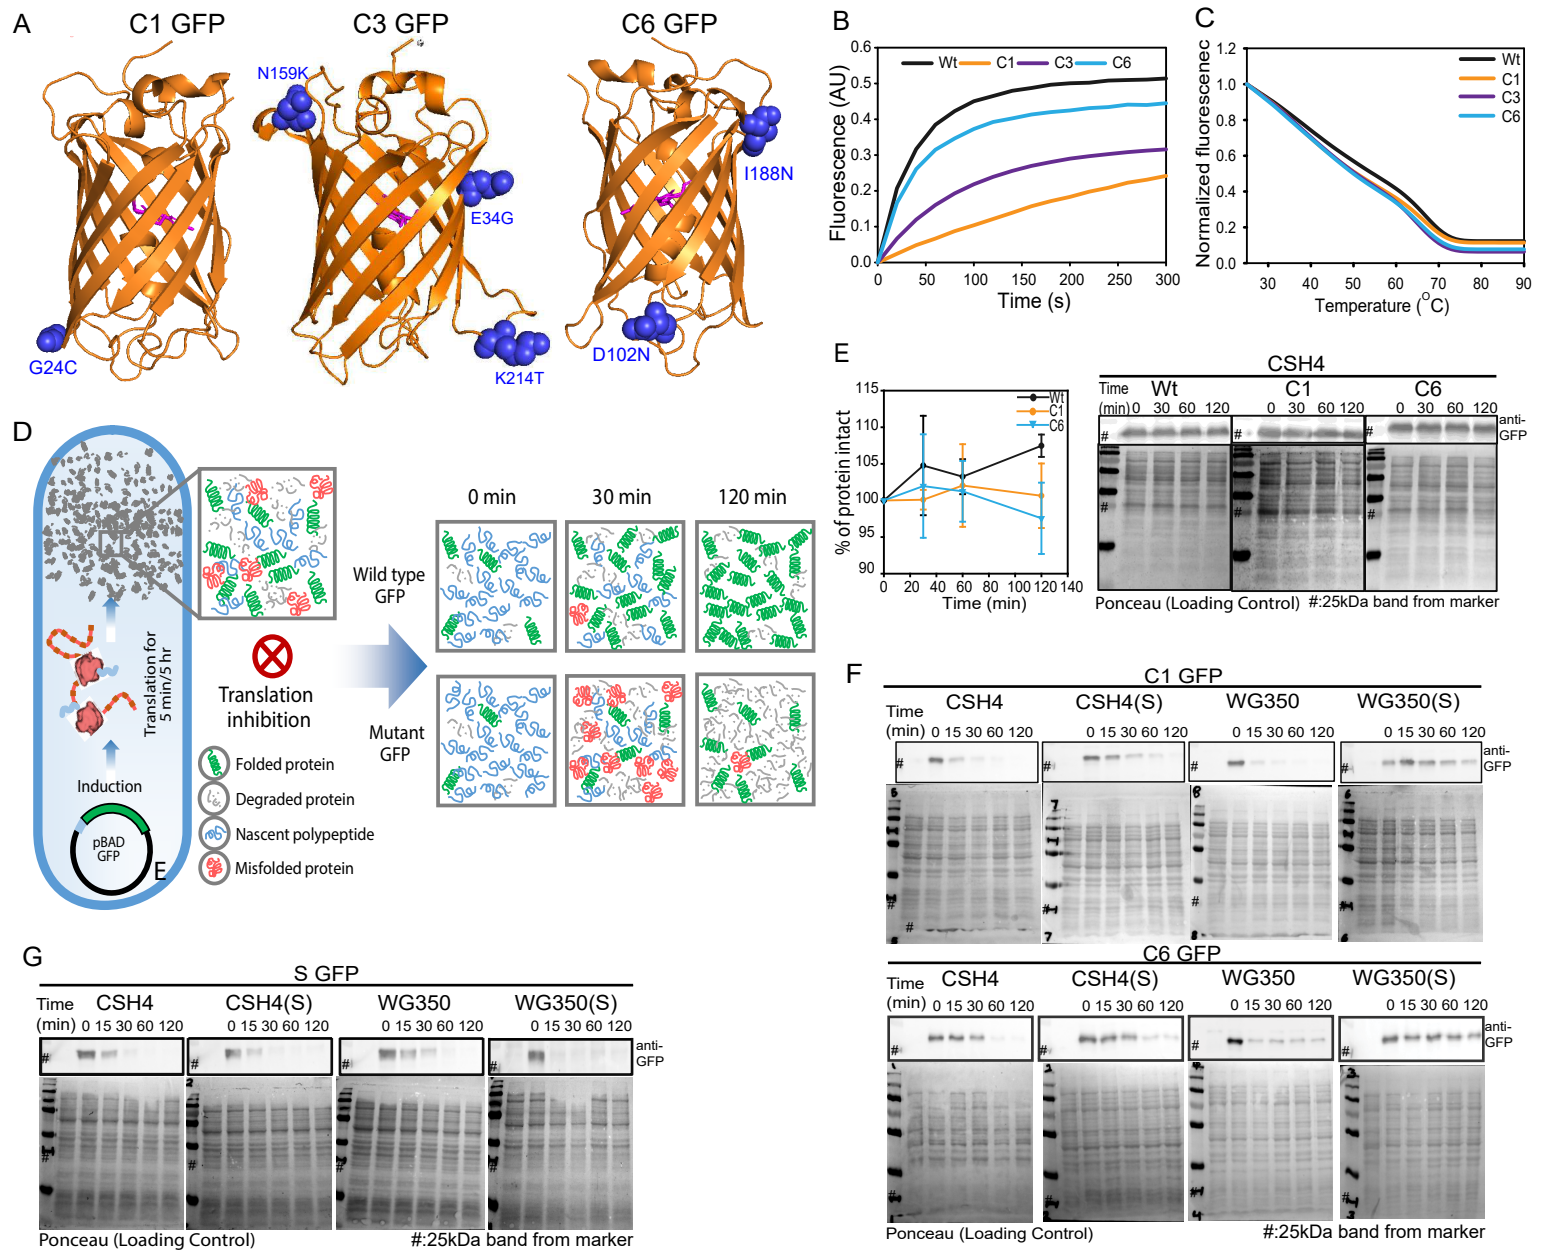

### Supplementary Figure 3: Fluorescence increase is not due to better proteostasis in WG350(S) (Related to Figure 4)

**A.** Mutations buffered in WG350 while growing in 350 mM NaCl (C1, C3, and C6) are marked on the GFP crystal structure (PDB ID: 1GFL) (Yang, Moss and Phillips, 1996). Fluorophore at the centre of the barrel is highlighted in magenta.

**B.** Refolding traces of Wt and GFP mutants obtained on unfolding the proteins in 6 M GuHCl, followed by a 100-fold dilution into Buffer-A (50 mM Tris, 150 mM KCl, 10 mM MgCl<sub>2</sub>, 2 mM DTT, pH 7.4) to a final concentration of 200 nM for the proteins. The GFP fluorescence (AU) is plotted against time (s).

**C.** Average thermal melt curves for Wt, C1, C3 and C6 GFP. Fluorescence of each mutants at different temperatures has been normalized to its respective fluorescence at 25°C.

**D.** Schematic of Chloramphenicol-based chase for degradation of GFP as described in Methods. After a short (5 min) induction of GFP with 0.5% arabinose, translation was stalled with Chloramphenicol. Cells were lysed at different points and the amount of intact GFP was monitored by immunoblotting with anti-GFP antibody.

**E.** Plot for the gel-based quantification of intact GFP (left) and representative images for immunoblotting to chase degradation of Wt, C1 and C6 GFP in CSH4 after 5 hr induction of GFP with 0.5% arabinose followed by translation arrest with Chloramphenicol. Ponceau has been used as loading control.

**F.** Representative images from 3 biological replicates for immunoblotting to chase degradation of nascent chains of C1 and C6 GFP as described in Methods in CSH4 and WG350 in presence and absence of osmotic stress. GFP degrades slowest in WG350(S). Ponceau has been used as loading control.

**G.** Representative images from 3 biological replicates for immunoblotting to chase degradation of sGFP in CSH4 and WG350 in presence and absence of osmotic stress. Ponceau has been used as loading control.

(Source data is provided as source data file Supplementary Figure 3)

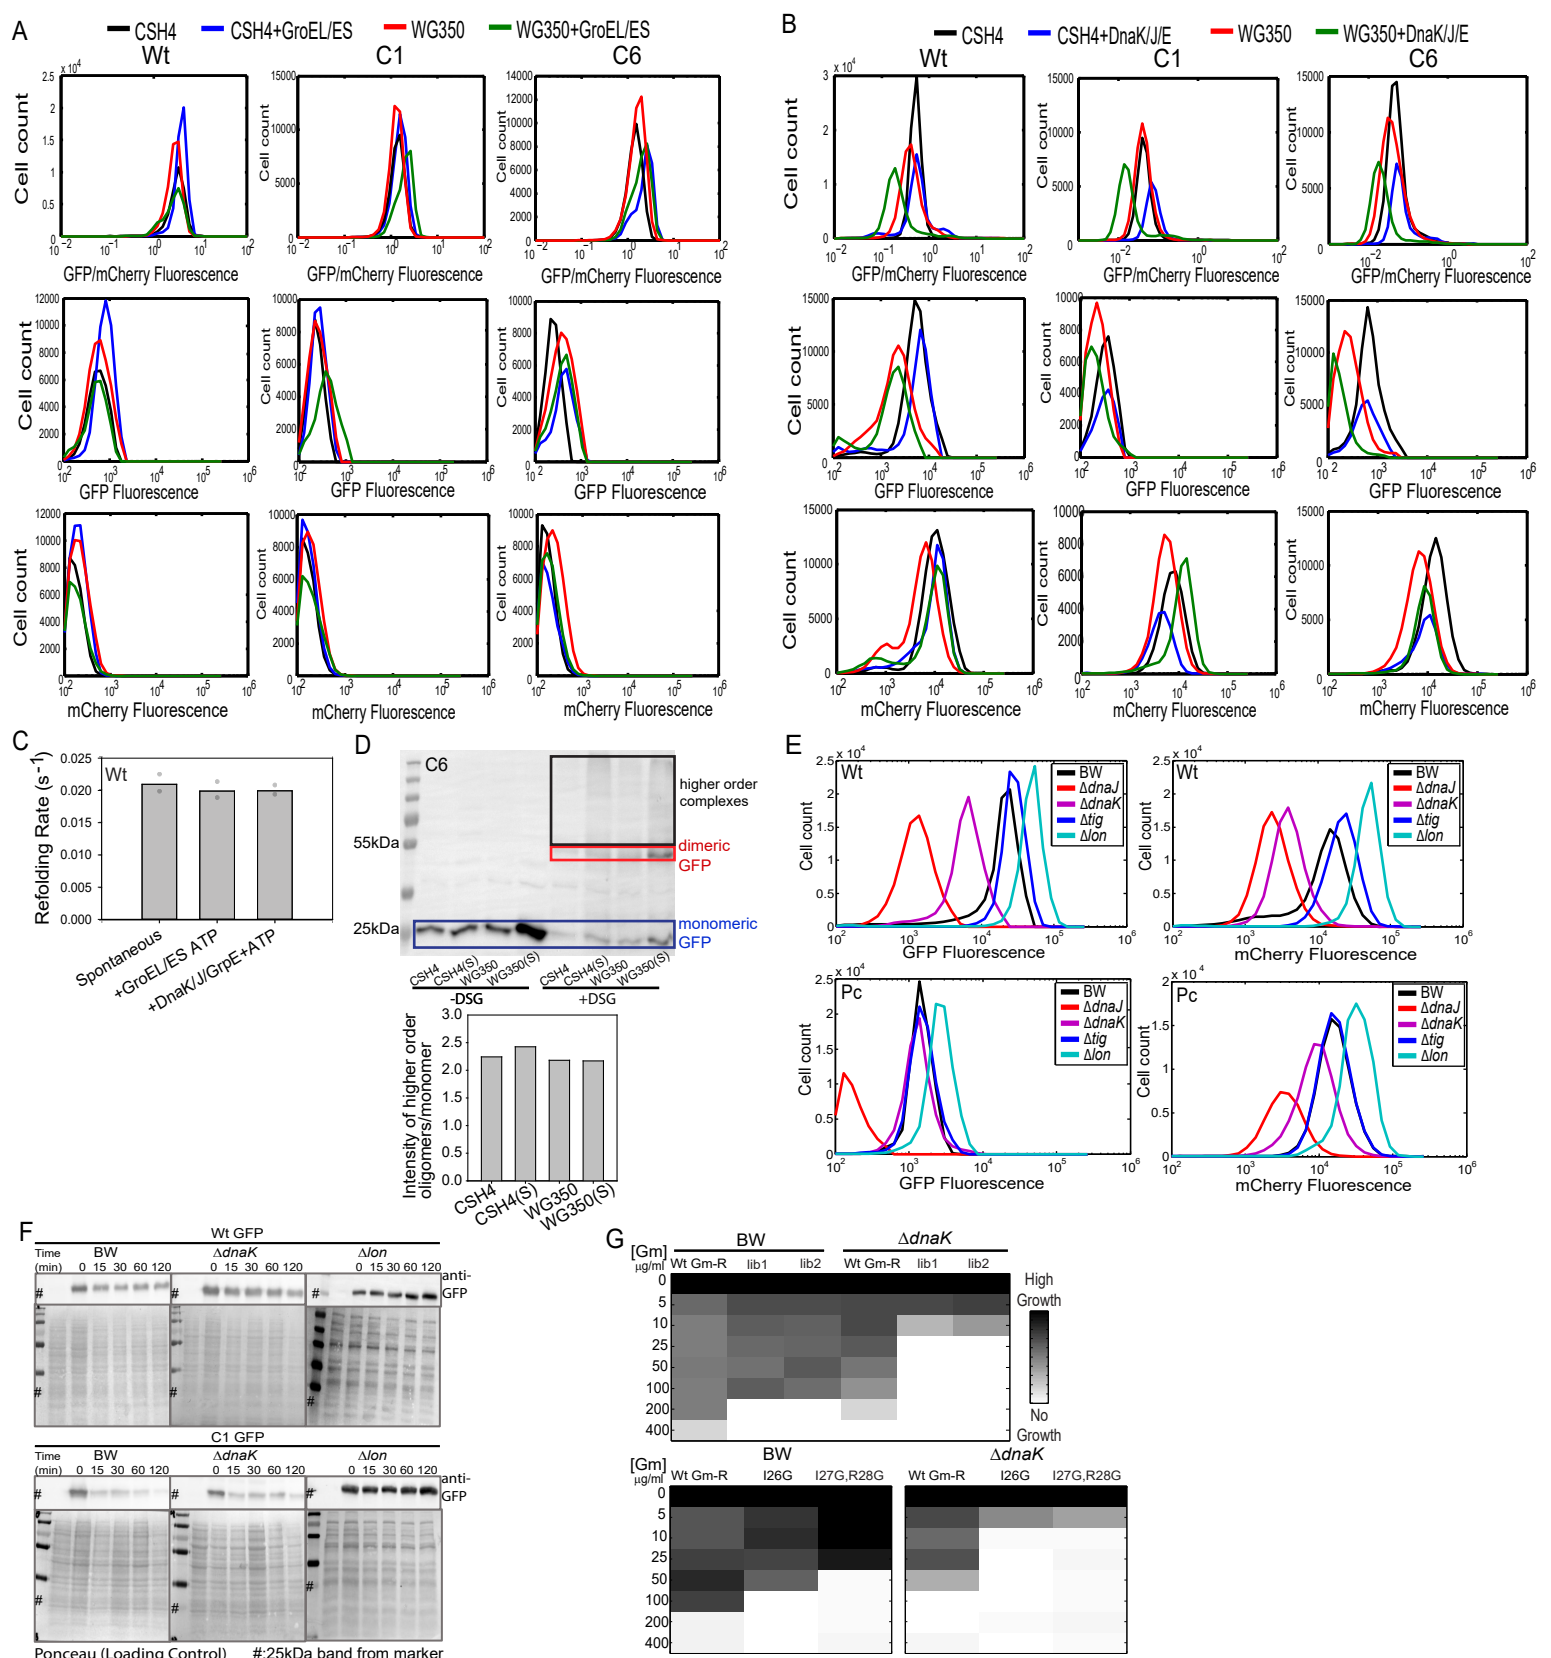

**Supplementary Figure 4: Observed buffering of GFP mutants is not channelled only through molecular chaperones (Related to Figure 5)**

**A.** Histograms for GFP/mCherry Fluorescence (top panel), GFP (middle panel) and mCherry fluorescence (bottom panel) in absence of overexpressed GroEL/ES (black, red, 2 biological replicates) and while co-expressed with GroEL/ES (blue, green, 2 biological replicates) in CSH4 and WG350. Induction protocol was followed as described in Methods.

**B.** Histograms for GFP/mCherry Fluorescence (top panel), GFP (middle panel) and mCherry fluorescence (bottom panel) in absence of overexpressed DnaK/J/GrpE (black, red, 2 biological replicates) and while co-expressed with DnaK/J/GrpE (blue, green, 2 biological replicates) in CSH4 and WG350.

**C.** Bar graph for mean rate of refolding for unfolded Wt GFP in presence and absence of 400 nM DnaK/800 nM DnaJ/400 nM GrpE or 400 nM GroEL/800 nM GroES.

**D.** Immunoblotting for GFP showing the recruitment of nascently formed C6 GFP into multimeric complexes. Free (or monomeric) GFP are shown with blue box, dimeric GFP are shown in red box and the multimeric complexes are shown in black box. The ratio of GFP in multimeric complex and the amount in monomeric state is shown in the accompanying bar graph.

**E.** Histograms of GFP or mCherry fluorescence of Wt GFP and pool of GFP mutants having compromised fluorescence (Pc) in BW and molecular chaperone and protease knockout strains ( $\Delta dnaJ$ ,  $\Delta dnaK$ ,  $\Delta tig$ ,  $\Delta lon$ ).

**F.** Representative images from 3 biological replicates for immunoblotting of chase degradation of Wt and C1 GFP in BW, chaperone ( $\Delta dnaK$ ), and protease ( $\Delta lon$ ) knockout strain. Ponceau has been used as loading control.

**G.** Heatmaps for growth-based activity of Wt and Gm-R mutant library (lib1, lib2) (top panel), Wt Gm-R and Gm-R mutants (I26G, I27G-R28G) in BW and molecular chaperone knockout strain ( $\Delta dnaK$ ) in increasing concentrations of Gentamicin.

(Source data is provided as source data file Supplementary Figure 4)

A

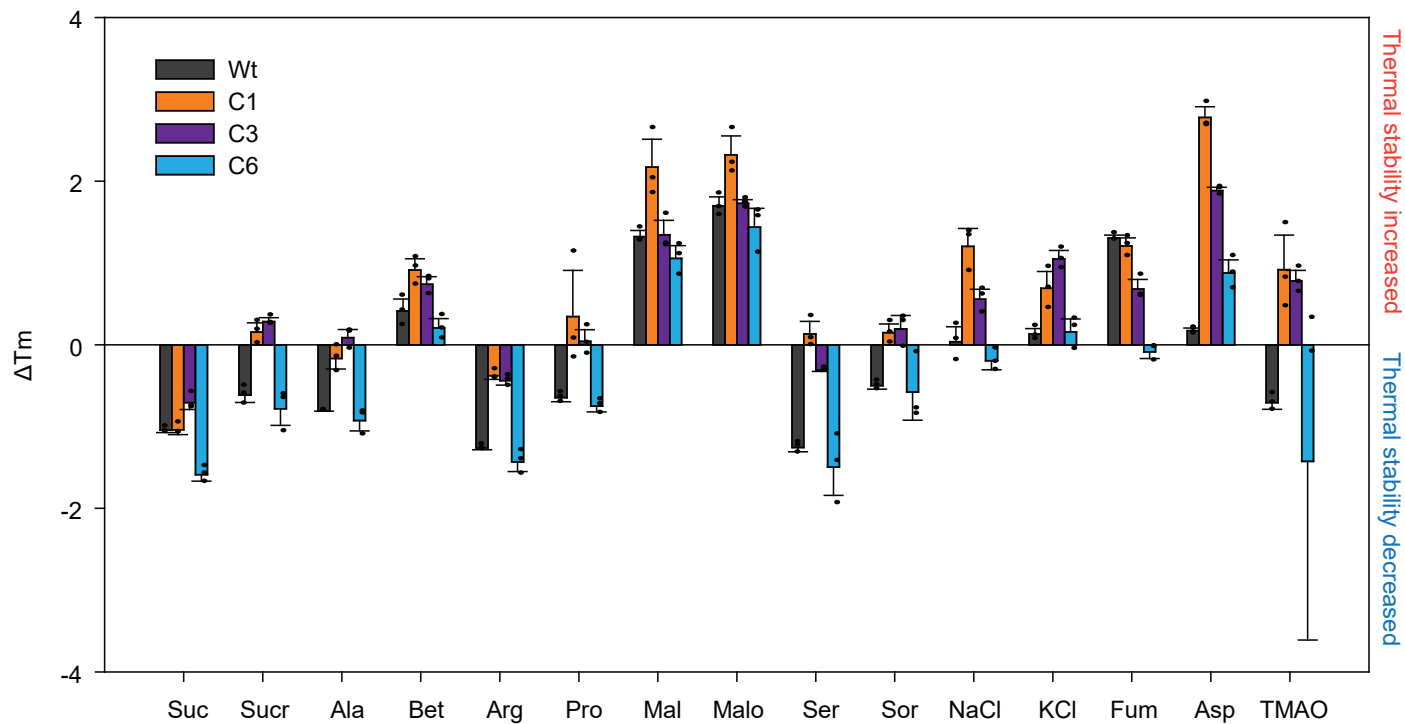

**Supplementary Figure 5: Different small molecules affect energetics of folding in a mutant specific manner (Related to Figure 6)**

**A.** Thermal melting profile of Wt, C1, C3 and C6 GFP as mean of change in melting temperature ( $\Delta T_m$ ) in presence of different small molecules. The mean of change in  $T_m$  in presence of a small molecule is obtained by subtracting  $T_m$  in presence of Buffer-A (50 mM Tris, 150 mM KCl, 10 mM MgCl<sub>2</sub>, 2 mM DTT, pH 7.4) from  $T_m$  in presence of that respective small molecule (100 mM). Error bars indicate standard deviation among 3 technical replicates.

Suc: Succinate, Sucr: Sucrose, Ala: Alanine, Bet: Betaine, Arg: Arginine, Pro: Proline, Mal: Malate, Malo: Malonate, Ser: Serine, Sor: Sorbitol, Fum: Fumarate, Asp: Aspartate, TMAO: Trimethylamine-N-oxide (Source data is provided as source data file Supplementary Figure 5)

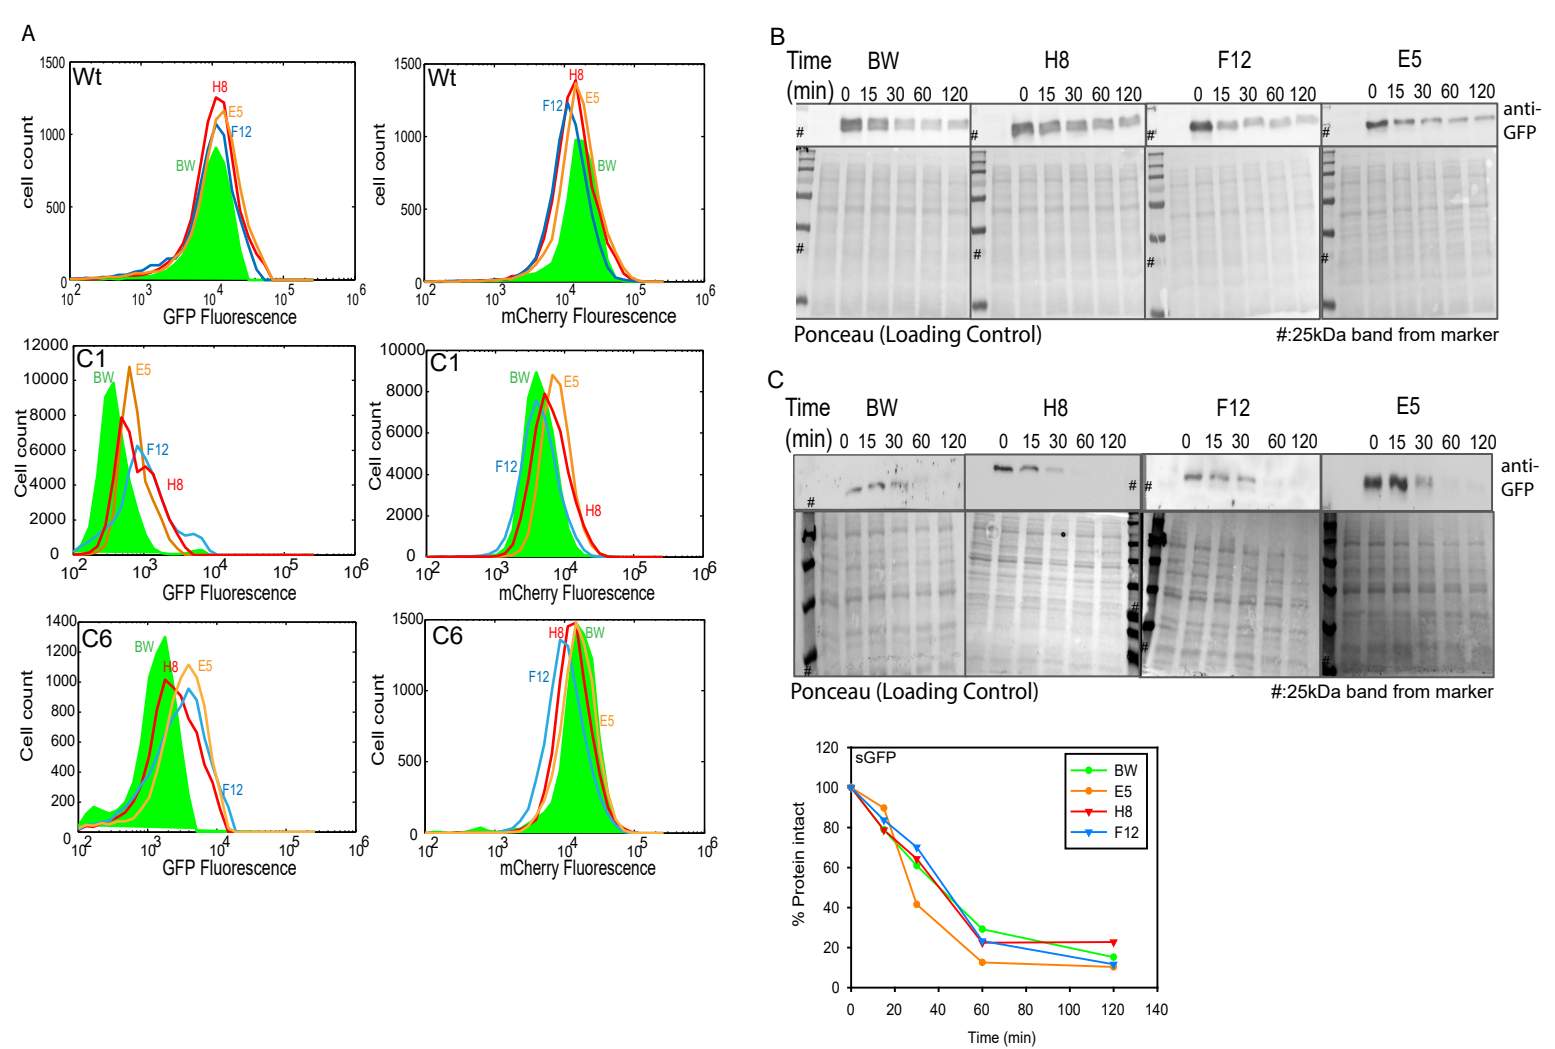

**Supplementary Figure 6: Modification in metabolome due to evolution changes the mutational buffering capacity of the cell (Related to Figure 8)**

**A.** Histograms for fluorescence of Wt and GFP mutants C1 and C6 represented as GFP (left panel) and mCherry fluorescence (right panel) in unevolved BW (WT *E. coli* K12, BW25113) and evolved osmotolerant strains E5, F12, H8.

**B.** Representative images from 3 biological replicates of Chloramphenicol based chase for checking degradation rates of C1 GFP in BW (WT *E. coli* K12, BW25113) and evolved strains E5, F12, H8. GFP is degraded slower in evolved strains than BW.

**C.** Chloramphenicol based chase for sGFP in BW (WT *E. coli* K12, BW25113) and evolved strains E5, F12, H8. sGFP is degraded with similar rates in evolved and unevolved BW as shown in densitometric analysis plot at the bottom.

(Source data is provided as source data file Supplementary Figure 6)

**Supplementary Table 1: Key resources table**

| <b>REAGENT</b>                                                                                                                                                        | <b>SOURCE</b>               | <b>IDENTIFIER</b> |
|-----------------------------------------------------------------------------------------------------------------------------------------------------------------------|-----------------------------|-------------------|
| <b>Antibodies</b>                                                                                                                                                     |                             |                   |
| Anti GroEL ( <i>E.coli</i> ) mouse monoclonal                                                                                                                         | ENZO                        | 9A1/2             |
| Anti DnaK ( <i>E.coli</i> ) mouse monoclonal                                                                                                                          | ENZO                        | 8E2/2             |
| Anti DnaJ ( <i>E.coli</i> ) rabbit polyclonal                                                                                                                         | ENZO                        | SPA410            |
| Anti Tig ( <i>E.coli</i> ) rabbit polyclonal                                                                                                                          | Genescript                  | A01329            |
| Anti GFP rabbit polyclonal                                                                                                                                            | Abcam                       | Ab290             |
| Anti RecA rabbit polyclonal                                                                                                                                           | Abcam                       | Ab125096          |
| Anti Mouse secondary                                                                                                                                                  | Santa Cruz<br>Biotechnology | SC2005            |
| Anti Rabbit secondary                                                                                                                                                 | Santa Cruz<br>Biotechnology | SC2030            |
| Di(N-succinimidyl) glutarate (DSG)                                                                                                                                    | Sigma                       | 80424             |
| <b>Bacterial and Virus Strains</b>                                                                                                                                    |                             |                   |
| <i>E.coli</i> BL21 (DE3)                                                                                                                                              |                             |                   |
| <i>E.coli</i> DH5 $\alpha$                                                                                                                                            |                             |                   |
| BW ( <i>E.coli</i> K12, BW25113)<br>F-, DE(araD-araB)567, lacZ4787(del)::rrnB-3,<br>LAM-, rph-1, DE(rhaD-rhaB)568, hsdR514                                            | (Baba <i>et al.</i> , 2006) | CGSC#: 7636       |
| $\Delta$ Tig (JW0426-1)<br>F-, $\Delta$ (araD-araB)567, $\Delta$ lacZ4787(::rrnB-3), $\Delta$ tig-<br>722::kan, $\lambda$ -, rph-1, $\Delta$ (rhaD-rhaB)568, hsdR514  | (Baba <i>et al.</i> , 2006) | CGSC#: 8589       |
| $\Delta$ dnaK (JW0013-4)<br>F-, $\Delta$ (araD-araB)567, $\Delta$ lacZ4787(::rrnB-3), $\lambda$ -, rph-<br>1, $\Delta$ dnaK734::kan, $\Delta$ (rhaD-rhaB)568, hsdR514 | (Baba <i>et al.</i> , 2006) | CGSC#: 8342       |
| $\Delta$ dnaJ (JW0014-1)<br>F-, $\Delta$ (araD-araB)567, $\Delta$ lacZ4787(::rrnB-3), $\lambda$ -,rph-<br>1, $\Delta$ dnaJ735::kan, $\Delta$ (rhaD-rhaB)568, hsdR514  | (Baba <i>et al.</i> , 2006) | CGSC#: 8343       |
| $\Delta$ clpA<br>F-, $\Delta$ (araD-araB)567, $\Delta$ lacZ4787(::rrnB-3), $\lambda$ -,<br>$\Delta$ clpA783::kan,rph-1, $\Delta$ (rhaD-rhaB)568, hsdR514              | (Baba <i>et al.</i> , 2006) | CGSC#: 8898       |
| $\Delta$ clpP<br>F-, $\Delta$ (araD-araB)567, $\Delta$ lacZ4787(::rrnB-3),<br>$\Delta$ clpP723::kan, $\lambda$ -,rph-1, $\Delta$ (rhaD-rhaB)568,<br>hsdR514           | (Baba <i>et al.</i> , 2006) | CGSC#: 8590       |
| $\Delta$ clpX<br>F-, $\Delta$ (araD-araB)567, $\Delta$ lacZ4787(::rrnB-3),<br>$\Delta$ clpX724::kan, $\lambda$ -, rph-1, $\Delta$ (rhaD-rhaB)568,<br>hsdR514          | (Baba <i>et al.</i> , 2006) | CGSC#: 8591       |
| $\Delta$ hslU<br>F-, $\Delta$ (araD-araB)567, $\Delta$ lacZ4787(::rrnB-3), $\lambda$ -, rph-<br>1, $\Delta$ (rhaD-rhaB)568, $\Delta$ hslU790::kan, hsdR514            | (Baba <i>et al.</i> , 2006) | CGSC#: 10817      |



|                                                                                                                   |                                                    |              |
|-------------------------------------------------------------------------------------------------------------------|----------------------------------------------------|--------------|
| <i>ΔhslV</i><br>F-, Δ(araD-araB)567, ΔlacZ4787(::rmB-3), λ-, rph-1, Δ(rhaD-rhaB)568, ΔhslV720::kan, hsdR514       | (Baba <i>et al.</i> , 2006)                        | CGSC#: 10818 |
| <i>ΔsecB</i><br>F-, Δ(araD-araB)567, ΔlacZ4787(::rmB-3), λ-, ΔsecB721::kan, rph-1, Δ(rhaD-rhaB)568, hsdR514       | (Baba <i>et al.</i> , 2006)                        | CGSC#: 10640 |
| CSH4<br>F, lacZ1125, λtrpA49(Am), relA1, rpsL150(strR), spoT                                                      | (Newton <i>et al.</i> , 1965)                      | CGSC#: 8196  |
| WG350<br>F-, lacZ1125, λ, Δ(putA-putP)101, trpA49(Am), ΔproU-600, relA1, rpsL150(strR), spoT1, Δ(proP-melB)212    | (Culham <i>et al.</i> , 1993)                      | CGSC#: 8195  |
| <b>Oligonucleotides</b>                                                                                           |                                                    |              |
| GFP Forward primer (to clone in pET SUMO)<br>CCCGGATCCATGTCTAAAGGTGAAGAATTA<br>TTCCTGGTGTGTTGCC                   | This Paper                                         |              |
| GFP Reverse primer (to clone in pET SUMO)<br>CCCAAGCTTTTATTTGTACAATTCATCCATA<br>CCATGGGTAATA                      | This Paper                                         |              |
| GFP Forward primer (to clone in pBAD vector)<br>TGTGCTGAATTCACATATATGTCTAAAGGT<br>GAAGAATTATCA                    | This Paper                                         |              |
| GFP Reverse primer (to clone in pBAD vector)<br>ACGGCCAAGCTTTTATTTGTACAATTCATCC<br>ATACCATGGG                     | This Paper                                         |              |
| RBS mCherry Forward primer (to clone in pBAD vector)<br>ACAAAGCTTTCATACCCGTTTTTTGGGCTA<br>ACAGGAGGAATTAACCATGGTGA | This Paper                                         |              |
| RBS mCherry Reverse primer (to clone in pBAD vector)<br>TCTAAGCTTCTACTTGTACAGCTCGTC                               | This Paper                                         |              |
| <b>Recombinant DNA</b>                                                                                            |                                                    |              |
| pOFX ELES (pOFX tac-SL2)                                                                                          | (Castanié <i>et al.</i> , 1997) <sup>70</sup>      |              |
| pOFX DnaK/J/GrpE (pOFX tac-KJE1)                                                                                  | (Castanié <i>et al.</i> , 1997) <sup>70</sup>      |              |
| pET duet1 dnaK                                                                                                    | (Tiwari <i>et al.</i> , 2013) <sup>71</sup>        |              |
| pET duet1 dnaJ                                                                                                    | (Tiwari <i>et al.</i> , 2013) <sup>71</sup>        |              |
| pET duet1 grpE                                                                                                    | (Tiwari <i>et al.</i> , 2013) <sup>71</sup>        |              |
| pET duet1 Mge1                                                                                                    | (Tiwari <i>et al.</i> , 2013) <sup>71</sup>        |              |
| pET SUMO sGFP                                                                                                     | Sadat & Mapa (in process)                          |              |
| pBAD Gm-R                                                                                                         | (Bandyopadhyay <i>et al.</i> , 2012) <sup>25</sup> |              |
| pBAD I26G Gm-R                                                                                                    | This Paper                                         |              |

|                                |                                                                                                                             |  |
|--------------------------------|-----------------------------------------------------------------------------------------------------------------------------|--|
| pBAD I27G, R28G Gm-R           | This Paper                                                                                                                  |  |
| pBAD 37G Gm-R                  | This Paper                                                                                                                  |  |
| pBAD 39G Gm-R                  | This Paper                                                                                                                  |  |
| pET SUMO Wt GFP                | This Paper                                                                                                                  |  |
| pET SUMO C1GFP                 | This Paper                                                                                                                  |  |
| pET SUMO C3FP                  | This Paper                                                                                                                  |  |
| pET SUMO C6GFP                 | This Paper                                                                                                                  |  |
| pBAD Wt GFP mCherry            | This Paper                                                                                                                  |  |
| pBAD C1GFP mCherry             | This Paper                                                                                                                  |  |
| pBAD C3GFP mCherry             | This Paper                                                                                                                  |  |
| pBAD C6GFP mCherry             | This Paper                                                                                                                  |  |
| <b>Software and Algorithms</b> |                                                                                                                             |  |
| Chimera                        |                                                                                                                             |  |
| Proteowizard                   | (Brown <i>et al.</i> , 2005) <sup>72</sup>                                                                                  |  |
| XCMS                           | (Smith <i>et al.</i> , 2006;<br>Silva <i>et al.</i> , 2014) <sup>73,74</sup>                                                |  |
| Maven                          | (Lu <i>et al.</i> , 2010;<br>Clasquin, Melamud and<br>Rabinowitz, 2012) <sup>65,66</sup>                                    |  |
| FastQC                         | <a href="http://www.citeulike.org/user/nailest/author/Andrews:S">http://www.citeulike.org/user/nailest/author/Andrews:S</a> |  |
| Trimmomatic                    | (Bolger, Lohse and<br>Usadel, 2014) <sup>61</sup>                                                                           |  |
| Kallisto                       | (Zhang <i>et al.</i> , 2017;<br>Bray <i>et al.</i> , 2016) <sup>62,63</sup>                                                 |  |
| EBseq                          | (Leng <i>et al.</i> , 2013) <sup>64</sup>                                                                                   |  |
| ImageJ                         |                                                                                                                             |  |
| Origin Pro8                    |                                                                                                                             |  |

**Supplementary Table 2: List of metabolites along with their log<sub>2</sub> of fold change and p-values obtained using 2-tailed paired student's t test from untargeted metabolite profiling and analysis using MAVEN platform (Related to Figure 2 and 3)**

| S.n o. | med Mz   | med Rt   | Max Quality | compound                  | Log <sub>2</sub> fold change |                     |                   |                      | -Log <sub>10</sub> p-value |                 |                   |                      |
|--------|----------|----------|-------------|---------------------------|------------------------------|---------------------|-------------------|----------------------|----------------------------|-----------------|-------------------|----------------------|
|        |          |          |             |                           | CSH4 - WG350                 | CSH4 (S) - CSH4 (S) | WG350 - WG350 (S) | CSH4 (S) - WG350 (S) | CSH4 - WG350               | CSH4 - CSH4 (S) | WG350 - WG350 (S) | CSH4 (S) - WG350 (S) |
| 1      | 363.0344 | 2.041682 | 0.848391    | N-Acetylputrescine        | 0.00                         | -14.03              | -14.29            | -0.26                | 0.01                       | 0.97            | 1.54              | 0.45                 |
| 2      | 283.0684 | 4.029608 | 0.849596    | Geranyl-PP                | 0.00                         | -13.99              | -13.89            | 0.10                 | 0.05                       | 1.67            | 1.43              | 0.20                 |
| 3      | 151.025  | 1.858412 | 0.819399    | fructose-1-6-bisphosphate | 0.00                         | -12.65              | 0.00              | 12.65                | 0.00                       | 2.24            | 0.43              | 5.16                 |

|    |                  |              |              |                                       |       |        |        |        |      |      |      |      |
|----|------------------|--------------|--------------|---------------------------------------|-------|--------|--------|--------|------|------|------|------|
| 4  | 116.<br>070<br>5 | 2.341<br>379 | 0.828<br>605 | succinate                             | 0.00  | -11.67 | -25.78 | -14.11 | 0.43 | 1.60 | 2.15 | 1.80 |
| 5  | 243.<br>062<br>2 | 2.131<br>804 | 0.848<br>934 | UMP                                   | 2.10  | -4.63  | -4.86  | 1.87   | 0.49 | 2.56 | 1.80 | 1.80 |
| 6  | 167.<br>020<br>4 | 2.374<br>183 | 0.847<br>362 | orotidine-<br>5--<br>phosphate        | 10.98 | -4.25  | -14.62 | 0.61   | 1.12 | 4.78 | 1.71 | 1.38 |
| 7  | 323.<br>029<br>1 | 3.537<br>884 | 0.851<br>401 | betaine                               | -0.93 | -4.17  | -7.94  | -4.70  | 0.53 | 0.95 | 0.98 | 1.78 |
| 8  | 606.<br>074<br>8 | 4.036<br>123 | 0.851<br>434 | Octoluse<br>Bisphosph<br>ate          | 1.06  | -3.88  | -4.69  | 0.24   | 0.15 | 1.00 | 1.04 | 0.28 |
| 9  | 565.<br>048<br>2 | 4.056<br>136 | 0.857<br>477 | tryptophan                            | 0.44  | -3.75  | -4.18  | 0.01   | 0.05 | 1.93 | 1.71 | 0.22 |
| 10 | 402.<br>994<br>9 | 2.973<br>083 | 0.849<br>58  | thiamine-<br>phosphate                | 0.12  | -3.73  | -2.99  | 0.87   | 0.01 | 1.34 | 1.15 | 3.48 |
| 11 | 180.<br>065<br>7 | 2.219<br>842 | 0.858<br>241 | fumarate                              | -2.93 | -3.27  | -6.82  | -6.49  | 0.88 | 0.51 | 3.44 | 1.03 |
| 12 | 203.<br>081<br>9 | 1.413<br>762 | 0.840<br>261 | FMN                                   | 1.54  | -2.86  | -1.06  | 3.34   | 1.17 | 1.98 | 0.65 | 4.25 |
| 13 | 203.<br>081<br>9 | 1.505<br>575 | 0.858<br>171 | asparagine                            | -1.04 | -2.73  | 0.10   | 1.79   | 0.62 | 2.12 | 0.10 | 3.83 |
| 14 | 341.<br>108<br>9 | 2.038<br>149 | 0.846<br>411 | glutathione<br>disulfide              | -1.96 | -2.52  | -0.13  | 0.43   | 1.29 | 1.15 | 0.39 | 0.24 |
| 15 | 421.<br>075<br>6 | 1.887<br>725 | 0.851<br>835 | CMP                                   | -1.08 | -2.37  | 1.97   | 3.26   | 0.47 | 1.60 | 1.10 | 1.82 |
| 16 | 241.<br>082<br>7 | 2.019<br>653 | 0.856<br>852 | GMP                                   | 1.22  | -2.33  | -2.11  | 1.44   | 1.97 | 4.11 | 2.86 | 3.62 |
| 17 | 344.<br>069<br>1 | 2.006<br>949 | 0.846<br>896 | UDP                                   | -0.13 | -2.28  | -1.68  | 0.47   | 0.10 | 4.33 | 3.04 | 0.73 |
| 18 | 424.<br>039      | 1.499<br>295 | 0.860<br>667 | aspartate                             | -0.40 | -1.99  | 2.16   | 3.75   | 0.64 | 3.32 | 2.82 | 5.07 |
| 19 | 264.<br>104<br>5 | 1.446<br>013 | 0.858<br>174 | trehalose/s<br>ucrose                 | 1.55  | -1.89  | -1.60  | 1.84   | 3.11 | 3.67 | 2.71 | 3.08 |
| 20 | 866.<br>124<br>9 | 1.450<br>47  | 0.857<br>708 | Cellobiose                            | 1.55  | -1.89  | -1.60  | 1.84   | 3.11 | 3.67 | 2.71 | 3.08 |
| 21 | 117.<br>018<br>6 | 2.093<br>047 | 0.854<br>168 | N-Acetyl-L-<br>alanine                | -1.80 | -1.77  | 0.08   | 0.05   | 0.78 | 1.01 | 0.38 | 0.06 |
| 22 | 171.<br>006<br>5 | 3.843<br>684 | 0.849<br>186 | IMP                                   | -0.41 | -1.66  | -1.07  | 0.18   | 0.38 | 2.09 | 1.54 | 0.45 |
| 23 | 253.<br>009<br>9 | 2.067<br>247 | 0.861<br>783 | Pyrogluta<br>mic acid                 | -1.85 | -1.53  | -0.12  | -0.43  | 0.64 | 0.67 | 0.41 | 0.80 |
| 24 | 368.<br>998<br>9 | 3.985<br>863 | 0.849<br>202 | S-methyl-<br>5--<br>thioadenos<br>ine | -0.27 | -1.28  | -1.28  | -0.28  | 0.15 | 1.34 | 1.39 | 0.43 |
| 25 | 266.<br>070<br>7 | 1.685<br>908 | 0.833<br>351 | ribose-<br>phosphate                  | -0.60 | -1.15  | 0.82   | 1.37   | 0.75 | 1.65 | 1.10 | 2.80 |
| 26 | 296.<br>080<br>6 | 2.066<br>397 | 0.852<br>619 | N-acetyl-L-<br>ornithine              | 0.30  | -1.10  | -1.11  | 0.30   | 0.35 | 2.75 | 2.67 | 0.64 |

|    |                  |              |              |                                       |       |       |       |       |      |      |      |      |
|----|------------------|--------------|--------------|---------------------------------------|-------|-------|-------|-------|------|------|------|------|
| 27 | 383.<br>115<br>2 | 3.042<br>196 | 0.771<br>733 | Acetyllysine                          | 0.05  | -0.96 | -0.98 | 0.04  | 0.11 | 1.80 | 2.12 | 0.13 |
| 28 | 229.<br>011<br>2 | 2.020<br>989 | 0.853<br>25  | adenosine                             | 0.89  | -0.91 | -1.32 | 0.48  | 0.93 | 2.14 | 2.15 | 2.26 |
| 29 | 375.<br>131      | 2.323<br>842 | 0.847<br>81  | xanthosine<br>-5-<br>phosphate        | -0.18 | -0.89 | -0.73 | -0.01 | 0.04 | 1.82 | 2.08 | 0.03 |
| 30 | 176.<br>935      | 4.759<br>889 | 0.852<br>717 | 2-<br>Isopropylm<br>alic acid         | 0.23  | -0.74 | -0.66 | 0.30  | 0.24 | 1.32 | 1.66 | 0.68 |
| 31 | 128.<br>034<br>1 | 1.833<br>35  | 0.853<br>449 | dCDP                                  | -0.36 | -0.47 | 0.46  | 0.58  | 0.07 | 1.29 | 0.49 | 2.60 |
| 32 | 168.<br>065<br>6 | 2.160<br>493 | 0.853<br>901 | xanthosine                            | 0.45  | -0.45 | -0.52 | 0.37  | 1.07 | 1.80 | 1.32 | 1.07 |
| 33 | 114.<br>055<br>1 | 10.95<br>572 | 0.731<br>41  | p-<br>hydroxybe<br>nzoate             | -0.33 | -0.42 | -0.22 | -0.14 | 0.67 | 0.25 | 1.34 | 0.49 |
| 34 | 225.<br>039<br>2 | 11.50<br>664 | 0.848<br>89  | Sedohepto<br>luse<br>bisphosph<br>ate | -0.26 | -0.24 | -0.07 | -0.09 | 0.28 | 0.00 | 0.14 | 0.08 |
| 35 | 145.<br>030<br>1 | 1.693<br>76  | 0.833<br>608 | cystathioni<br>ne                     | 0.19  | -0.23 | -1.06 | -0.64 | 0.54 | 0.38 | 1.94 | 0.55 |
| 36 | 218.<br>102<br>9 | 1.981<br>234 | 0.860<br>063 | hypoxanthi<br>ne                      | -0.22 | -0.19 | -0.01 | -0.04 | 0.52 | 0.74 | 0.11 | 0.03 |
| 37 | 137.<br>023<br>2 | 1.572<br>158 | 0.857<br>927 | glutamine                             | -0.07 | -0.16 | -0.09 | 0.00  | 0.28 | 0.01 | 0.07 | 0.06 |
| 38 | 367.<br>019<br>8 | 1.393<br>888 | 0.848<br>99  | UDP-D-<br>glucose                     | -0.14 | -0.14 | -0.10 | -0.09 | 0.64 | 0.59 | 0.14 | 0.02 |
| 39 | 131.<br>081<br>4 | 6.987<br>23  | 0.856<br>877 | Kynurenin<br>e                        | 0.22  | -0.11 | -0.34 | -0.02 | 0.22 | 0.36 | 1.13 | 0.16 |
| 40 | 399.<br>013<br>1 | 5.573<br>004 | 0.850<br>927 | riboflavin                            | -0.10 | -0.09 | -0.13 | -0.14 | 0.07 | 0.04 | 0.50 | 0.29 |
| 41 | 319.<br>046<br>3 | 5.199<br>954 | 0.849<br>735 | Thiamine<br>pyrophosp<br>hate         | -0.03 | -0.09 | -0.05 | 0.01  | 0.12 | 0.54 | 0.56 | 0.12 |
| 42 | 146.<br>044<br>7 | 5.076<br>94  | 0.840<br>613 | Octoluse<br>8/1P                      | 0.10  | -0.08 | -0.32 | -0.14 | 0.20 | 0.50 | 0.53 | 0.25 |
| 43 | 742.<br>069<br>5 | 3.301<br>201 | 0.735<br>053 | valine                                | 0.22  | -0.08 | -0.36 | -0.06 | 0.27 | 0.36 | 1.11 | 0.22 |
| 44 | 664.<br>118      | 1.939<br>427 | 0.662<br>212 | cyclic-AMP                            | 0.27  | -0.02 | 0.62  | 0.91  | 0.55 | 0.64 | 1.54 | 1.10 |
| 45 | 662.<br>102<br>7 | 8.182<br>36  | 0.852<br>802 | tryptophan                            | 0.28  | -0.01 | -0.40 | -0.11 | 0.20 | 0.13 | 0.99 | 0.61 |
| 46 | 175.<br>035<br>1 | 1.743<br>987 | 0.851<br>61  | glucose-6-<br>phosphate               | 0.35  | 0.04  | 1.96  | 2.27  | 0.75 | 0.07 | 0.43 | 3.75 |
| 47 | 129.<br>102<br>3 | 6.072<br>19  | 0.850<br>308 | thiamine                              | 0.00  | 0.05  | -0.08 | -0.14 | 0.13 | 0.05 | 0.50 | 0.34 |
| 48 | 173.<br>092<br>2 | 2.708<br>844 | 0.814<br>59  | pantothena<br>te                      | 0.40  | 0.06  | -0.53 | -0.18 | 0.33 | 0.03 | 1.38 | 0.97 |
| 49 | 130.<br>049<br>8 | 5.998<br>872 | 0.854<br>558 | biotin                                | 0.14  | 0.06  | -0.17 | -0.09 | 0.19 | 0.08 | 0.77 | 0.16 |

|    |          |          |          |                                   |       |      |       |       |      |      |      |      |
|----|----------|----------|----------|-----------------------------------|-------|------|-------|-------|------|------|------|------|
| 50 | 187.0716 | 1.777959 | 0.832413 | shikimate-3-phosphate             | 0.04  | 0.06 | 0.20  | 0.18  | 0.44 | 0.47 | 1.26 | 0.37 |
| 51 | 188.0556 | 1.504867 | 0.772704 | N-acetylglutamine                 | 0.04  | 0.09 | 0.16  | 0.10  | 0.02 | 0.01 | 1.50 | 1.00 |
| 52 | 300.0466 | 1.719046 | 0.848407 | guanine                           | -0.13 | 0.13 | 0.24  | -0.02 | 0.45 | 0.03 | 0.79 | 0.22 |
| 53 | 179.0552 | 1.501844 | 0.85144  | inosine                           | -0.21 | 0.17 | 1.76  | 1.37  | 0.00 | 0.07 | 2.49 | 1.18 |
| 54 | 134.0294 | 2.00565  | 0.855251 | dGMP                              | 0.40  | 0.25 | 0.12  | 0.27  | 0.68 | 0.33 | 0.71 | 0.24 |
| 55 | 148.0426 | 3.28745  | 0.850251 | D-sedoheptulose-1/7-phosphate     | 0.19  | 0.26 | 0.12  | 0.05  | 0.03 | 0.17 | 0.99 | 0.45 |
| 56 | 133.0131 | 1.936306 | 0.677158 | methionine                        | -0.17 | 0.29 | 0.50  | 0.05  | 0.16 | 1.54 | 0.85 | 0.13 |
| 57 | 145.0971 | 1.390545 | 0.850053 | UDP-N-acetylglucosamine           | -0.21 | 0.40 | 0.18  | -0.42 | 0.17 | 0.40 | 0.66 | 0.17 |
| 58 | 205.0347 | 2.536442 | 0.851966 | proline                           | -0.88 | 0.40 | -1.20 | -2.48 | 0.33 | 0.24 | 0.81 | 1.84 |
| 59 | 289.1155 | 1.833144 | 0.851898 | $\alpha$ -ketoglutarate           | 0.38  | 0.42 | 1.06  | 1.02  | 1.23 | 1.41 | 2.15 | 1.78 |
| 60 | 207.077  | 2.012048 | 0.833829 | tyrosine                          | 0.15  | 0.48 | 0.51  | 0.18  | 0.70 | 2.96 | 2.09 | 1.13 |
| 61 | 267.0725 | 1.519962 | 0.766428 | Amino adipic acid                 | 0.22  | 0.49 | 0.01  | -0.26 | 0.38 | 1.51 | 0.22 | 1.52 |
| 62 | 347.0395 | 2.04751  | 0.799432 | N-acetylglutamate                 | 0.26  | 0.53 | 0.47  | 0.19  | 0.21 | 1.07 | 0.92 | 0.36 |
| 63 | 135.0301 | 3.948531 | 0.850648 | acetyl-CoA                        | 0.12  | 0.55 | 1.77  | 1.34  | 0.04 | 2.12 | 2.55 | 2.32 |
| 64 | 112.4286 | 1.409344 | 0.858314 | arginine                          | 0.12  | 0.56 | 0.53  | 0.09  | 0.51 | 1.82 | 2.03 | 0.09 |
| 65 | 154.0611 | 1.914433 | 0.856739 | glutathione                       | 0.05  | 0.57 | 0.97  | 0.45  | 0.03 | 1.40 | 2.23 | 1.89 |
| 66 | 282.0861 | 1.459852 | 0.857308 | ornithine                         | -0.04 | 0.58 | 0.55  | -0.07 | 0.34 | 0.41 | 2.33 | 0.09 |
| 67 | 150.0411 | 2.037107 | 0.853763 | thymidine                         | 0.18  | 0.59 | 0.36  | -0.04 | 0.44 | 1.94 | 2.04 | 0.31 |
| 8  | 362.0511 | 1.499073 | 0.851382 | L-argininosuccinate               | -0.38 | 0.63 | 2.28  | 1.27  | 0.38 | 1.49 | 2.82 | 0.84 |
| 69 | 611.1408 | 2.658341 | 0.853422 | N-acetylglucosamine-1/6-phosphate | 0.02  | 0.67 | 0.51  | -0.14 | 0.21 | 2.95 | 2.74 | 0.61 |
| 70 | 306.0765 | 1.728165 | 0.823201 | N-carbamoyl-L-aspartate           | 0.61  | 0.73 | 0.23  | 0.11  | 0.87 | 0.40 | 0.17 | 0.02 |
| 71 | 145.0607 | 2.06878  | 0.715853 | uridine                           | 0.12  | 0.75 | 0.56  | -0.06 | 0.21 | 2.06 | 1.65 | 0.42 |

|    |          |          |          |                                            |       |      |       |       |      |      |      |      |
|----|----------|----------|----------|--------------------------------------------|-------|------|-------|-------|------|------|------|------|
| 72 | 259.022  | 1.509566 | 0.783648 | pyridoxine                                 | -0.08 | 0.76 | 0.58  | -0.26 | 0.11 | 3.64 | 3.39 | 2.73 |
| 73 | 178.0714 | 1.853829 | 0.854485 | sn-glycerol-3-phosphate                    | 0.08  | 0.83 | 0.36  | -0.39 | 0.00 | 2.49 | 1.50 | 1.29 |
| 74 | 177.0395 | 2.04771  | 0.750985 | xanthine                                   | -0.02 | 0.84 | 0.62  | -0.24 | 0.23 | 2.54 | 2.09 | 1.04 |
| 75 | 313.0589 | 2.024257 | 0.820586 | citrate/isocitrate                         | 0.48  | 0.85 | 0.79  | 0.42  | 0.68 | 1.42 | 1.53 | 1.24 |
| 76 | 109.5264 | 1.386311 | 0.855701 | adenosine 5-phosphosulfate                 | 0.31  | 0.85 | 0.50  | -0.04 | 0.53 | 2.48 | 2.30 | 0.33 |
| 77 | 338.989  | 1.485925 | 0.818313 | O-acetyl-L-serine                          | -0.14 | 0.93 | 0.85  | -0.22 | 0.73 | 3.92 | 3.35 | 1.01 |
| 78 | 455.1014 | 6.339029 | 0.859511 | 2,3-dihydroxybenzoic acid                  | -1.45 | 0.94 | -0.60 | -2.99 | 2.03 | 1.58 | 1.11 | 3.67 |
| 79 | 784.1508 | 1.505536 | 0.850999 | cytidine                                   | -0.05 | 0.96 | 0.86  | -0.15 | 0.01 | 4.59 | 3.03 | 0.30 |
| 80 | 321.0496 | 1.780281 | 0.860946 | malate                                     | -0.10 | 0.99 | 0.15  | -0.95 | 0.12 | 1.90 | 0.05 | 4.07 |
| 81 | 346.0558 | 1.441355 | 0.856271 | lysine                                     | 1.42  | 1.02 | -0.06 | 0.34  | 1.83 | 1.76 | 0.14 | 1.05 |
| 82 | 686.1423 | 1.567711 | 0.853065 | lipoate                                    | 0.04  | 1.08 | 0.61  | -0.43 | 0.38 | 3.09 | 2.51 | 2.90 |
| 83 | 251.0776 | 4.043802 | 0.84958  | FAD                                        | -0.14 | 1.11 | 0.56  | -0.69 | 0.23 | 3.17 | 0.87 | 1.06 |
| 84 | 250.0937 | 2.100759 | 0.846352 | NADP+                                      | 0.30  | 1.11 | 1.08  | 0.27  | 0.04 | 0.65 | 1.58 | 0.25 |
| 85 | 386.0172 | 1.486119 | 0.856649 | D-gluconate                                | -0.02 | 1.15 | 1.23  | 0.05  | 0.30 | 2.63 | 3.13 | 0.20 |
| 86 | 289.0352 | 1.507047 | 0.851621 | 2-dehydro-D-gluconate                      | -0.21 | 1.28 | 1.75  | 0.27  | 0.04 | 2.48 | 1.42 | 0.27 |
| 87 | 258.0375 | 1.453563 | 0.828056 | histidine                                  | 0.30  | 1.30 | 1.00  | 0.01  | 0.46 | 2.73 | 3.55 | 0.11 |
| 88 | 195.0502 | 2.024109 | 0.852796 | dTMP                                       | -0.94 | 1.31 | 1.59  | -0.66 | 1.19 | 1.38 | 2.20 | 1.03 |
| 89 | 199.0007 | 1.550444 | 0.856554 | homoserine                                 | -2.41 | 1.32 | -1.46 | -5.18 | 0.76 | 0.25 | 0.97 | 1.45 |
| 90 | 242.078  | 2.027355 | 0.788688 | glucono- $\delta$ -lactone                 | 0.47  | 1.33 | 1.05  | 0.18  | 0.65 | 2.37 | 1.75 | 0.20 |
| 91 | 239.0147 | 1.507822 | 0.829343 | myo-inositol                               | -0.17 | 1.38 | 1.11  | -0.44 | 0.91 | 4.50 | 3.63 | 1.23 |
| 92 | 221.0598 | 1.489268 | 0.854986 | citrulline                                 | -0.20 | 1.46 | 1.22  | -0.43 | 0.35 | 3.66 | 2.77 | 1.07 |
| 93 | 328.0454 | 3.954113 | 0.838432 | succinyl-CoA/methylmalonyl-CoA             | -0.26 | 1.66 | 1.51  | -0.42 | 0.34 | 1.03 | 2.36 | 0.81 |
| 94 | 689.0877 | 2.038819 | 0.852447 | cyclic bis(3 $\rightarrow$ 5-) dimeric GMP | -0.18 | 1.68 | 1.61  | -0.24 | 2.83 | 3.02 | 2.29 | 0.14 |

|     |          |          |          |                               |       |       |       |        |      |      |      |         |
|-----|----------|----------|----------|-------------------------------|-------|-------|-------|--------|------|------|------|---------|
| 95  | 766.1091 | 1.525817 | 0.835367 | Phenylpropiolic acid          | 0.14  | 1.75  | 1.23  | -0.37  | 0.00 | 0.58 | 1.85 | 0.47    |
| 96  | 322.0445 | 3.260484 | 0.848054 | coenzyme A                    | -1.70 | 1.77  | 1.48  | -1.99  | 1.48 | 2.14 | 1.76 | 3.87    |
| 97  | 174.0874 | 1.793035 | 0.851756 | D-erythrose-4-phosphate       | 0.19  | 1.89  | 1.83  | 0.14   | 0.42 | 1.66 | 1.94 | 0.01    |
| 98  | 191.019  | 1.979981 | 0.851608 | Methylcysteine                | 0.95  | 2.07  | 1.70  | 0.58   | 0.58 | 1.09 | 0.71 | 0.54    |
| 99  | 341.1089 | 1.499742 | 0.852927 | S-ribosyl-L-homocysteine-nega | 0.12  | 2.14  | 0.40  | -1.63  | 0.11 | 2.81 | 0.72 | 1.16    |
| 100 | 243.0804 | 1.504422 | 0.852072 | deoxyinosine                  | 0.31  | 2.21  | 1.33  | -0.57  | 0.79 | 2.89 | 2.21 | 0.13    |
| 101 | 116.0711 | 1.985581 | 0.85367  | NADH                          | -2.59 | 2.54  | 3.62  | -1.52  | 1.44 | 0.68 | 3.51 | 0.63    |
| 102 | 132.0291 | 1.759809 | 0.850709 | trehalose-6-Phosphate         | 2.73  | 2.56  | 0.30  | 0.47   | 3.62 | 3.26 | 0.95 | 2.36    |
| 103 | 131.045  | 1.46988  | 0.853972 | deoxyadenosine                | 0.33  | 2.69  | 1.93  | -0.43  | 0.47 | 4.44 | 2.27 | 0.21    |
| 104 | 173.1035 | 1.516454 | 0.850518 | D-glucosamine-6-phosphate     | 0.68  | 2.77  | 1.61  | -0.49  | 0.69 | 1.86 | 0.67 | 0.30    |
| 105 | 160.0605 | 1.466613 | 0.852018 | glucosamine                   | 0.42  | 2.83  | 2.92  | 0.51   | 0.89 | 3.49 | 2.96 | 0.18    |
| 106 | 426.0121 | 2.080937 | 0.848104 | NAD+                          | -0.69 | 3.58  | 2.11  | -2.15  | 0.07 | 2.46 | 0.79 | 1.78    |
| 107 | 266.091  | 1.819532 | 0.852153 | Pyrophosphate                 | 0.22  | 4.02  | 3.37  | -0.43  | 0.55 | 5.90 | 4.13 | 0.82    |
| 108 | 187.108  | 1.889188 | 0.850813 | Uric acid                     | -0.31 | 4.32  | 3.55  | -1.08  | 0.17 | 4.38 | 2.87 | 0.74    |
| 109 | 808.1196 | 2.336574 | 0.830013 | dephospho-CoA                 | -1.36 | 11.89 | 2.10  | -11.15 | 1.16 | 1.83 | 1.11 | 0.44    |
| 110 | 145.0132 | 2.367599 | 0.838086 | Cystine                       | 1.04  | 12.24 | 11.20 | 0.00   | 2.09 | 7.53 | 1.86 | 0.43    |
| 111 | 153.0182 | 1.50954  | 0.803857 | S-adenosyl-L-homoCysteine     | -0.86 | 12.98 | 13.85 | 0.00   | 1.67 | 8.01 | 6.35 | #DIV/0! |
| 112 | 175.0602 | 1.598831 | 0.850469 | prephenate                    | 0.46  | 13.61 | 13.14 | 0.00   | 0.07 | 5.34 | 1.52 | 0.75    |
| 113 | 193.0346 | 1.51109  | 0.831777 | guanosine                     | 0.08  | 14.42 | 1.34  | -13.00 | 0.45 | 1.36 | 2.89 | 1.14    |

**Key:** med Mz: Median  $m/z$  for metabolites, medRt: Median Retention Time, Max Quality: quality of peaks detected, compound: Metabolite, CSH4 - WG350:  $\log_2$  of fold change and between CSH4 and WG350, CSH4 - CSH4 (S):  $\log_2$  of fold change between CSH4 and CSH4 salt, WG350 - WG350 (S):  $\log_2$  of fold change between WG350 and WG350 salt, CSH4 (S)- WG350 (S):  $\log_2$  of fold change between CSH4 salt and WG350 salt

### Supplementary Table 3: ODEs used for the kinetic simulations. (Related to figure 4)

Numerical simulation was set up with a fixed concentration of mRNA/ribosome complex (S). These complexes could either form nascent polypeptides (U) with a rate  $k_{trans}$  that is a collective rate constant for transcription/translation, or be inhibited with a rate constant  $k_{block}$  in the presence of a translation inhibitor (I). The pool of U could either degrade with a rate  $k_{deg}$  or fold with a rate constant of  $k_f$  and reach the native state (F). We finally monitor the total amount of undegraded protein (U+F) after blocking translation after 300 s of starting the simulation (simulation start mimics induction). The reaction volume was kept at 1 liter.

#### ODEs:

$$d(U)/dt = -\text{ReactionFlux1} - \text{ReactionFlux2} + \text{ReactionFlux3}$$

$$d(F)/dt = \text{ReactionFlux1}$$

$$d(S)/dt = -\text{ReactionFlux3} - \text{ReactionFlux4}$$

$$d(B)/dt = \text{ReactionFlux4}$$

$$d(I)/dt = -\text{ReactionFlux4}$$

#### Fluxes:

$$\text{ReactionFlux1} = k_f \cdot U$$

$$\text{ReactionFlux2} = k_d \cdot U$$

$$\text{ReactionFlux3} = k_{trans} \cdot S$$

$$\text{ReactionFlux4} = k_i \cdot S \cdot I$$

#### Parameter Values:

$$k_f = 0.02 \text{ (s}^{-1}\text{)}$$

$$k_{deg} = 0.01 \text{ (s}^{-1}\text{)}$$

$$k_{trans} = 0.001 \text{ (s}^{-1}\text{)}$$

$$k_i = 0.0001 \text{ (M}^{-1}\text{s}^{-1}\text{)}$$

$$\text{cell volume} = 1 \text{ (liters)}$$

#### Initial Conditions (micromoles):

$$U = 0$$

$$F = 0$$

$$S = 1000$$



B = 0

I = 0

**Dosing:**

Delay: 300 s

1 mM of I added to reaction

**Supplementary Table 4: Concentration of metabolites added to LB to measure effect of metabolites on Fluorescence *in vivo* (Related to Figure 7)**

| <b>S. no.</b> | <b>Metabolite</b> | <b>Concentration (mM)</b> |
|---------------|-------------------|---------------------------|
| 1             | Alanine           | 200                       |
| 2             | Arginine          | 2.5                       |
| 3             | Betaine           | 200                       |
| 4             | Proline           | 200                       |
| 5             | Serine            | 200                       |
| 6             | TMAO              | 200                       |
| 7             | Aspartate         | 200                       |
| 8             | Malate            | 100                       |
| 9             | Malonate          | 100                       |
| 10            | Fumarate          | 100                       |
| 11            | Succinate         | 100                       |
| 12            | KCL               | 350                       |
| 13            | Sucrose           | 400                       |
| 14            | Sorbitol          | 400                       |

**Supplementary Table 5: Identity of genes along with the type of mutation observed in the evolved osmotolerant strains E5 and H8 on genome sequencing (Related to Figure 8)**

| <b>Strain</b> | <b>Gene</b> | <b>Type</b> |
|---------------|-------------|-------------|
| H8            | mngA        | Ins del     |
| H8            | hyfB        | Ins del     |
| H8            | fucl        | Ins del     |
| H8            | kefC        | missense    |
| H8            | sgrR        | missense    |
| H8            | mraY        | missense    |
| H8            | ftsW        | missense    |
| H8            | dxs         | missense    |
| H8            | cstA        | stop        |

|    |      |          |
|----|------|----------|
| H8 | mngA | missense |
| H8 | clpA | missense |
| H8 | flgL | missense |
| H8 | oppB | missense |
| H8 | uidR | missense |
| H8 | otsA | missense |
| E5 | mngA | Ins del  |
| E5 | csiR | Ins del  |
| E5 | fucl | Ins del  |
| E5 | rihC | missense |
| E5 | lptD | missense |
| E5 | mraY | missense |
| E5 | malZ | stop     |
| E5 | cyoA | missense |
| E5 | paaH | missense |
| E5 | sdaA | missense |
